# Supplementary material for: The primary microRNA-208b interacts with Polycomb-group protein, Ezh2, to regulate gene expression in the heart
Source: PubMed Central journal article supplement — Nucleic Acids Res. 2013 Oct 9;42(2):790–803. doi: 10.1093/nar/gkt896 (PMC3902903; doi:10.1093/nar/gkt896), 2013-10-09

## Supplementary Figure Legends

### Figure S1

Administration of TSA after TAC surgery attenuated the expression of hypertrophy associated gene expression in mice LV. \* $p < 0.002$ ; \*\* $p < 0.01$ . n = 5

### Figure S2

H3K9m3 histone enrichment at the intergenic bdP was examined from left ventricles of Sham, TAC and TSA by ChIP and assessed by qPCR.

### Figure S3

Expression of *Ezh2* and *Hdac2* mRNA in Sham, TAC and TSA animals as determined by qRT-PCR.

### Figure S4

RNA-ChIP using histone H3 antibody in left ventricles of control (Sham) animals show specific enrichment for *AS  $\beta$ -MHC* transcript in chromatin purified RNA samples.

### Figure S5

shRNA-mediated silencing of *Ezh2* enzyme is confirmed by immunoblot.  
nt=non-target control, *Ezh2*KD=*Ezh2* knockdown cells.

### Figure S6

HDAC inhibition by TSA is associated with increased H3K9/14ac enrichment at the intergenic bdP in *Ezh2*-KD cells. \* $p < 0.01$ . n = 4

### Figure S7

TSA stimulation in *Ezh2*-KD cells increased H3K4m3 methylation at the intergenic bdP.  
\* $p < 0.01$ ; \*\* $p < 0.02$ . n = 4

### Figure S8

Loss of *AS  $\beta$ -MHC* transcript did not alter the chromatin binding of *Ezh2* at the intergenic bdP.  
\* $p < 0.007$ . n = 3

### Figure S9

Enrichment of H3K27m3 marks at the intergenic bdP remains unaffected in *AS  $\beta$ -MHC* deficient cells.

### Figure S10

The stable chromatin association of *pri-miR-208b* transcript in *AS  $\beta$ -MHC* deficient cells was reduced when stimulated with TSA

### Figure S11

Nuclear snoRNA is nearly depleted in cytosolic fraction serving as control. \* $p < 0.0007$ . n = 3

### Figure S12

18S rRNA expression is predominant to cytoplasmic fraction isolated from *Sca1+* cells.  
\* $p < 0.0007$ . n = 3

### Figure S13

Immunoblotting for nuclear *Brm*, *Mecp2* proteins and cytosolic *Gapdh* serves as controls for nuclear and cytosolic fractionation

### Figure S14

Gene expression profiles of *Sca1+* vascular progenitor cells compared to mouse neonatal ventricular cardiomyocytes (NVCM) after TSA treatment. Relative mRNA levels quantified by qRT-PCR.  
\* $p < 0.03$ . n = 3

## Oligonucleotide Sequences

### Amplimer sets used for mRNA gene expression

|                |                                                            |                 |                                                  |
|----------------|------------------------------------------------------------|-----------------|--------------------------------------------------|
| <i>Anp</i>     | ACAGCCAAGGAGGAAAAGGC<br>CCACAGTGGCAATGTGACCA               | <i>GAPDH</i>    | TGAAGCAGGCATCTGAGGG<br>CGAAGGTGGAAGAGTGGGAG      |
| <i>Bnp</i>     | TCCAGAGCAATTC AAGATGCA<br>CTTTTGTGAGGCCTTGGTCC             | <i>18S rRNA</i> | TCGGAAGT GAGGCCATGATT<br>CTTTTCGCTCTGGTCCGCTT    |
| <i>Serca2a</i> | CCCCCTGGGAGAATATCTGG<br>GATCTGGAAAATGAGCGGCA               | <i>Med13</i>    | ATCCATCAAGTGCCTGCTTC<br>GTGCGGACTGAGGATCAACT     |
| <i>EZH2</i>    | CTAATTGGTACTTACTACGATAACTTT<br>ACTCTAAACTCATAACCTGTCTACAT  | <i>Oct4</i>     | CTCCCGAGGAGTCCAGGACAT<br>GATGGTGGTCTGGCTGAACACCT |
| <i>α-MHC</i>   | CCACCTGGGCAAGTCTAACAA<br>TGTAGTCCACGGTGCCAGC               | <i>Sca1</i>     | TGCAGAAAGAGCTCAGGGACTGG<br>TCCATCAGGGTAGGGGCAGGT |
| <i>β-MHC</i>   | GATGTTTTTGTGCCCGATGA<br>ACCGTCTTGCCATTCTCCG                | <i>Sox2</i>     | AAGGAGAGAAGTTTGGAGCC<br>TCTGGCGGAGAATAGTTGG      |
| <i>Tgfb3</i>   | CCCAACCCAGCTCCAAGCG<br>CCTCAACAGCCACTCGCGCA                | <i>Six</i>      | TTAAGAACCCGGAGGCAAAGA<br>GGGGGTGAGAACTCCTCTTC    |
| <i>Spp1</i>    | GCCTGTTTGGCATTGCCTCCTC<br>CACAGCATTCTGTGGCGCAAGG           |                 |                                                  |
| <i>Sln</i>     | GAGGTGGAGAGACTGAGGTCCTTGG<br>GAAGCTCGGGGCACACAGCAG         |                 |                                                  |
| <i>Nanog</i>   | CAAGGGTCTGCTACTGAGATGCTCTG<br>TTTTGTTTGGGACTGGTAGAAGAATCAG |                 |                                                  |

### Amplimer sets used for ChIP

|                                  |                                               |
|----------------------------------|-----------------------------------------------|
| <i>Primer A</i> (-3.3 kb α-MHC)  | CAAGAGAAAGCAGACAACAG<br>CGGACTCACTCACTCTTTTT  |
| <i>Primer B</i> (-2.7 kb α-MHC)  | AGGGAGGATCACACTGGATG<br>TGAGGCTCTACCACCAGTCC  |
| <i>Primer C</i> (-2.2 kb α-MHC)  | ATGGTCCTTCTCACCTGTGG<br>GGTTTGGCCTCTTCTTCCTT  |
| <i>Primer D</i> (-1.7 kb α-MHC)  | GAGCCTCAAGTGACCTCCAG<br>CTCCAAGGGACCTGATTCAA  |
| <i>Primer E</i> (-1.2 kb α-MHC)  | TCAGTCTGCAGAGCCCCTAT<br>GGCTGAGGGAGAAAGGGTAT  |
| <i>Primer F</i> (-0.8 kb α-MHC)  | GCTGTGCAGCTGTTTCAGTTC<br>CAGGCCATCATCCAATCTCT |
| <i>Primer G</i> (-0.3 kb α-MHC)  | TATTAAGCCTGGAAGAGAAG<br>GCAGATAGAGGAGAGACAGG  |
| <i>Primer H</i> (+0.7 kb α-MHC)  | CAATCTTCCAGTGAGCCA CA<br>CTGGACGGAGAGAGGAACAG |
| Antisense 3' end 1 (AS 3' end 1) | GCAACCACAATGGACTTTCC<br>ACGATGGCGATGTTCTCTTT  |
| Antisense 3' end 2 (AS 3' end 2) | GCATGCATTGGTTCAGAATG<br>AGCCGCAGTAGGTTCTTCCT  |
| <i>Anp</i> (+41 to +142)         | GTGGGCAGAGACAGCAAACA<br>AAGCCAAAAGGCCAAGACG   |
| <i>Bnp</i> (-6 to +155)          | AGCTCAGCCGGCAGGAAT<br>CGTGTCTCCCTTGTCTCGC     |

# Supplementary Figures S1-S8

## Figure S1

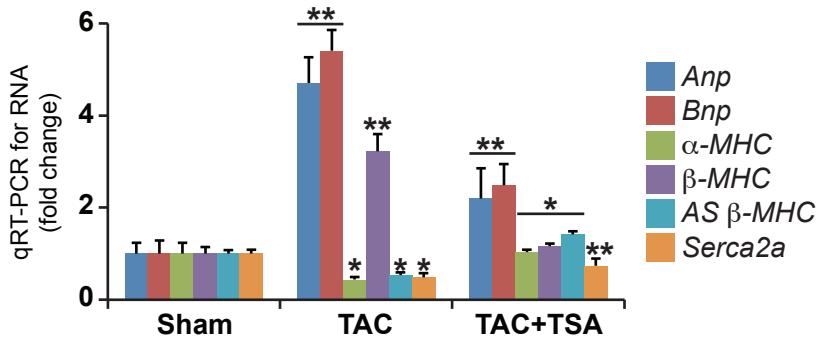

## Figure S5

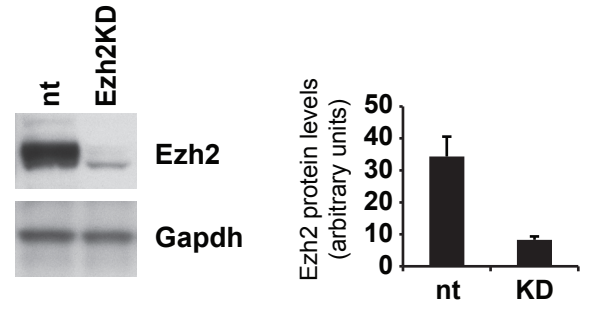

## Figure S2

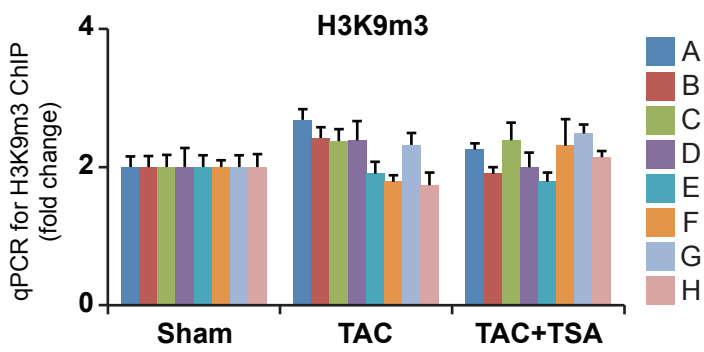

## Figure S6

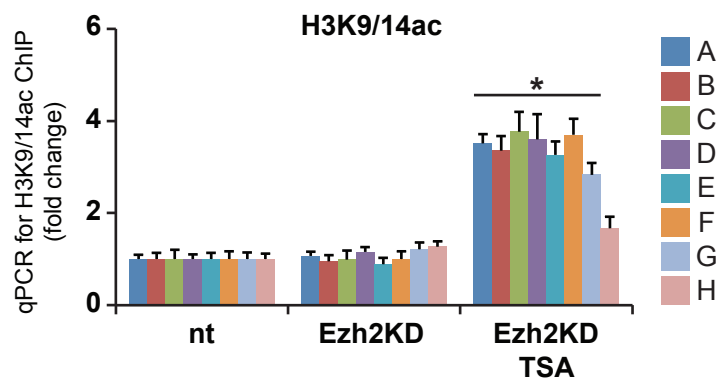

## Figure S3

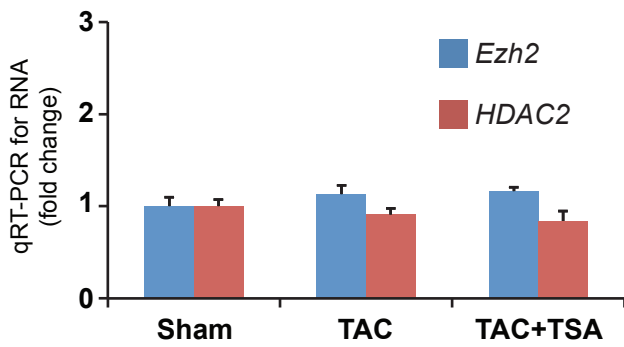

## Figure S7

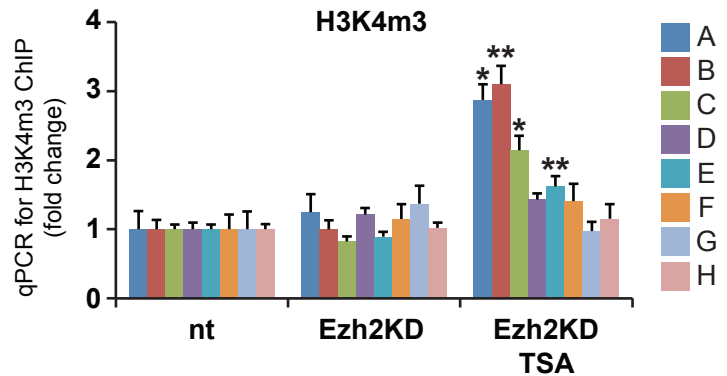

## Figure S4

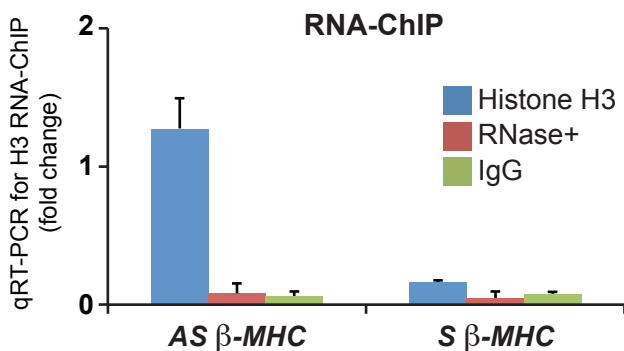

## Figure S8

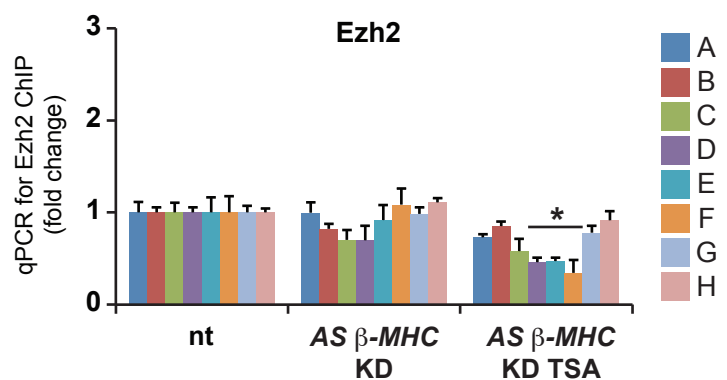

# Supplementary Figures S9-S14

## Figure S9

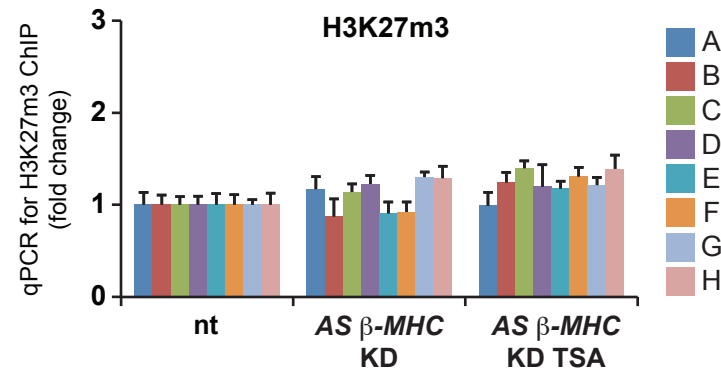

## Figure S11

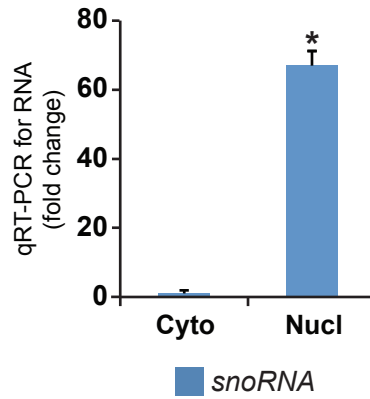

## Figure S12

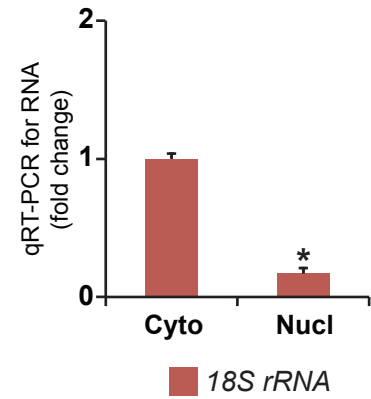

## Figure S10

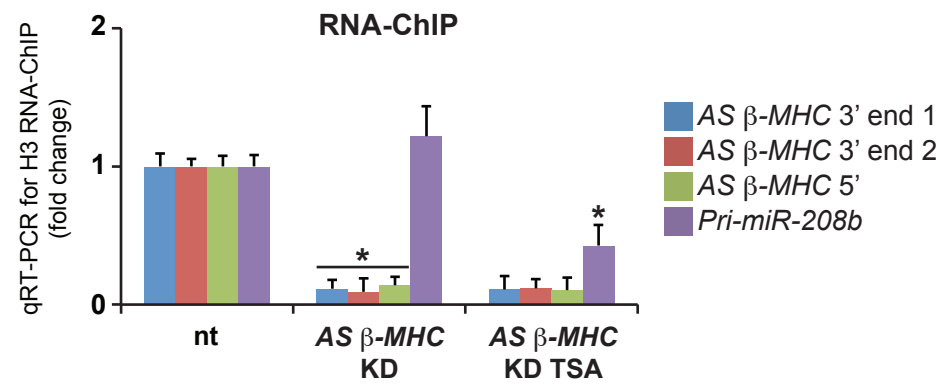

## Figure S13

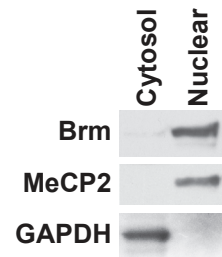

## Figure S14

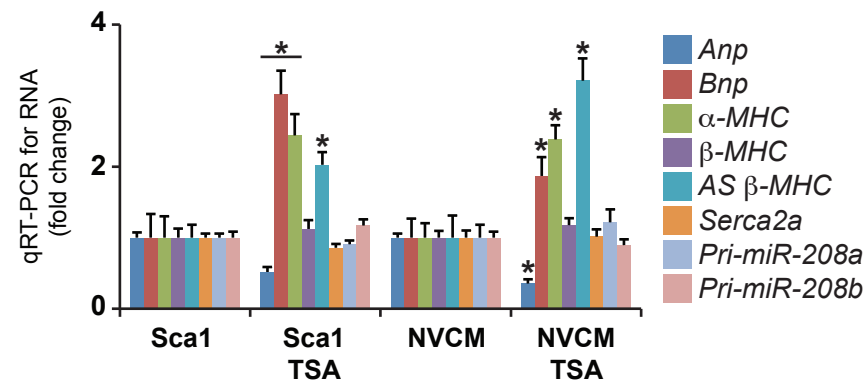

Supplement: supp_gkt896_nar-01619-a-2013-File002.pdf [file supp_gkt896_nar-01619-a-2013-File002.pdf]
